# Supplementary material for: The effect of an ancillary ligand proton on the photophysical properties of some RuIIN6cores: a proton valve
Source: Royal Society of Chemistry journal article supplement (doi:10.1039/c7nj02274c), 2017-01-01
Supplement: c7nj02274c1.pdf [file c7nj02274c1.pdf]

## Supplementary Material

for

# Effect of ancillary ligand proton on the photophysical properties of some Ru<sup>II</sup>N<sub>6</sub> cores. A proton valve

Shanti G. Patra, Ennio Zangrando and Dipankar Datta\*

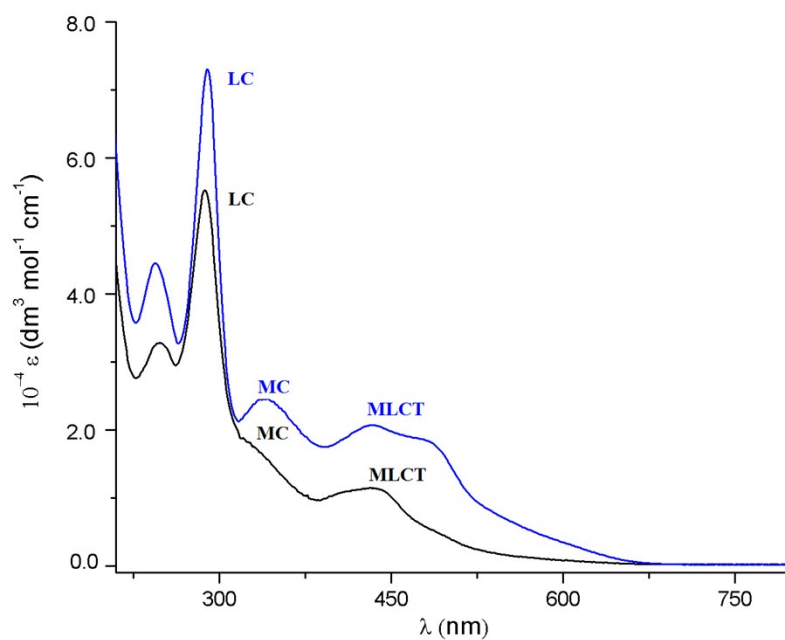

**Fig. S1.** Electronic spectra of **1a** (black) and **1b** (blue) in acetonitrile.

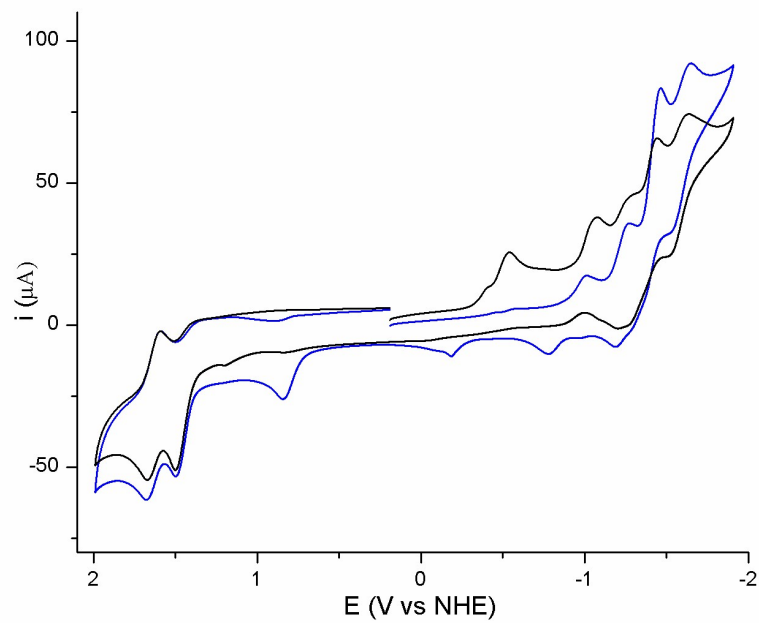

**Fig. S2.** Cyclic voltammogram of **1a** (black) and **1b** (blue) in  $\text{CH}_3\text{CN}$ ,  $0.1 \text{ mol dm}^{-3}$  in TEAP at a GC electrode. Solute concentration is  $1 \text{ mmol dm}^{-3}$ . Scan rate:  $100 \text{ mV s}^{-1}$ .

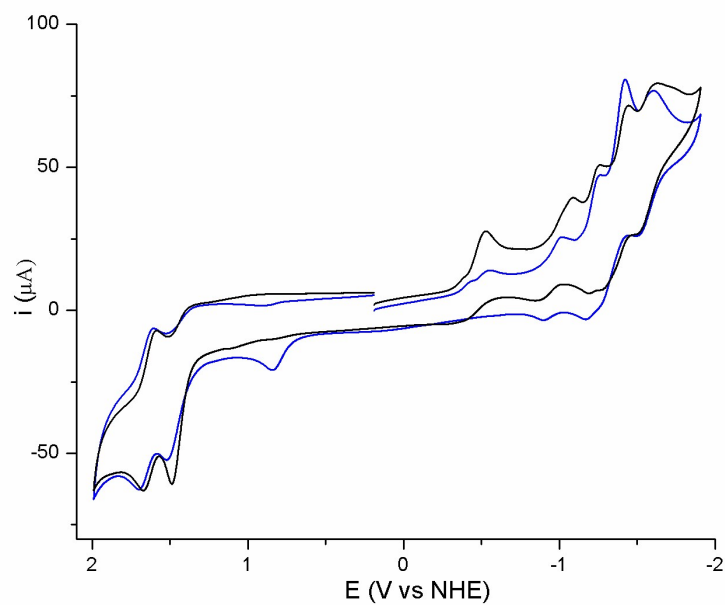

**Fig. S3.** Cyclic voltammogram of **2a** (black) and **2b** (blue) in  $\text{CH}_3\text{CN}$ ,  $0.1 \text{ mol dm}^{-3}$  in TEAP at a GC electrode. Solute concentration is  $1 \text{ mmol dm}^{-3}$ . Scan rate:  $100 \text{ mV s}^{-1}$ .

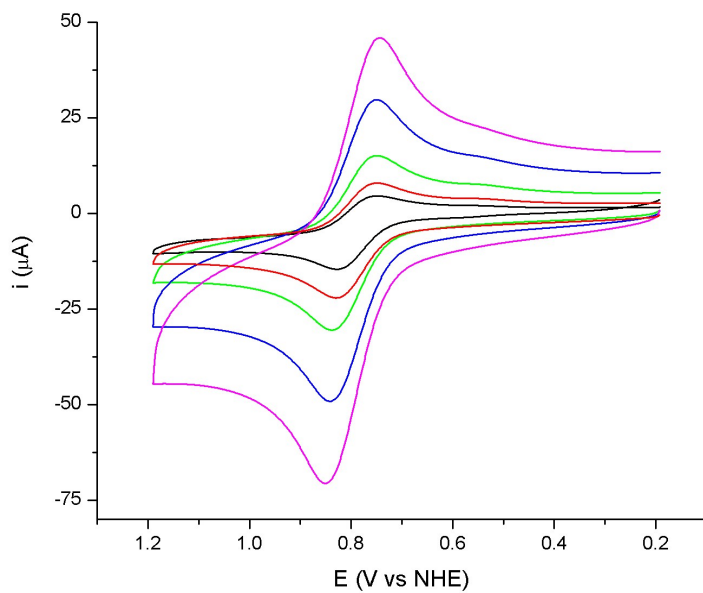

**Fig. S4.** A portion of the cyclic voltammogram of **2b** in CH<sub>3</sub>CN, 0.1 mol dm<sup>-3</sup> in TEAP at a GC electrode. Solute concentration is 1 mmol dm<sup>-3</sup>. Scan rate (mV s<sup>-1</sup>): 50, black; 100, red; 200, green; 500, blue; 1000, magenta.

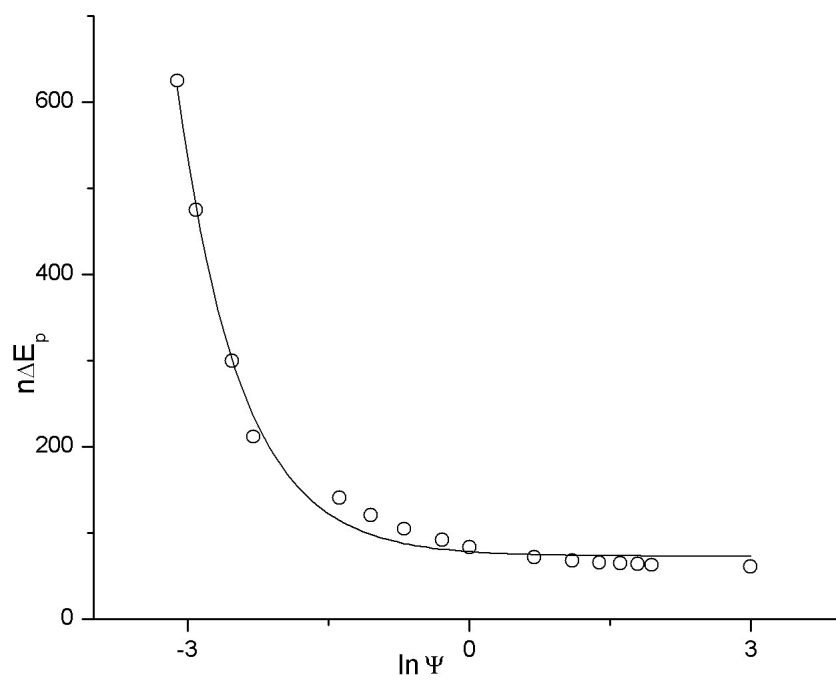

**Fig. S5.** Working relationship of  $\Delta E_p$  vs  $\ln \psi$ ;  $r^2 = 0.992$ . It has been created by using Nicholson's data.<sup>37</sup>

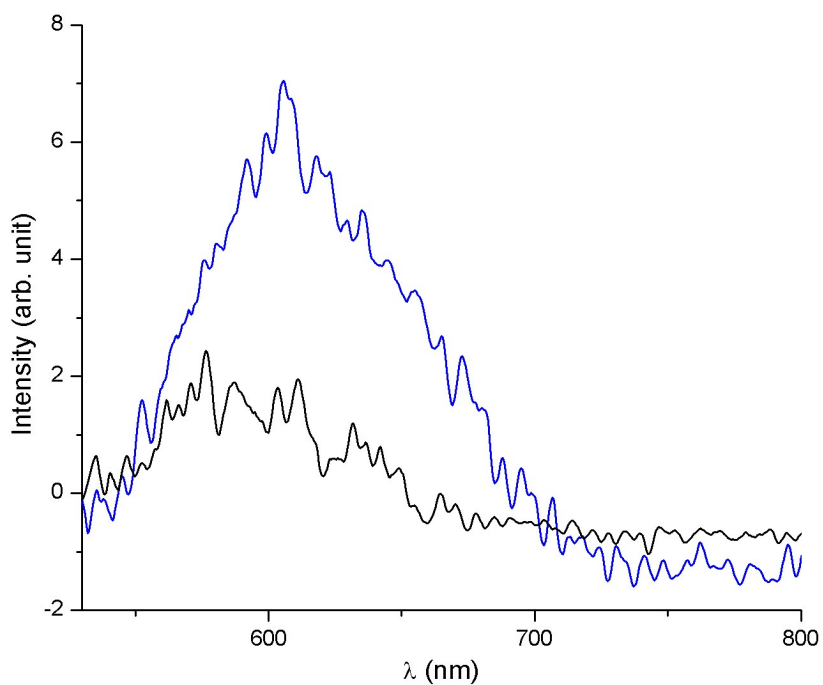

**Fig. S6.** Emission spectra of **1a** (blue) and **2a** (black) in deaerated CH<sub>2</sub>Cl<sub>2</sub>. The absorbance of both the solutions was 0.5 at 430 nm which was the  $\lambda$  excitation. Quantum yields  $\phi$  are  $1.17 \times 10^{-4}$  and  $6.13 \times 10^{-5}$  for **1a** and **2a** respectively.
